# Supplementary material
Source: HighWire-hosted journal article supplement (https://erj.ersjournals.com/content/60/5/2200300)
Supplement: inline-supplementary-material-2 [file inline-supplementary-material-2.pdf]

## **Supplement file**

### **Summary of inclusion and exclusion criteria used for the search**

Exclude studies published before 2000 (as threshold for using antibiotics for treatment has changed [clinicians and parents' perspectives] and chest CT-scans became available for diagnosing bronchiectasis since 1982).

| Inclusion                                                        | Exclude                                       | Study design           | Setting                            | Timing         |
|------------------------------------------------------------------|-----------------------------------------------|------------------------|------------------------------------|----------------|
| Children/adolescents with BE aged 0-18 years with bronchiectasis | Non-English, adults, CF or papers before 2000 | RCTs and observational | Any (hospital, out-patients, home) | Not applicable |

- Subgroup summary
  - For studies on (a) treatment of exacerbation and (b) as outcome
  - Severity of exacerbation

**Database search strategies** (designed and undertaken by Mrs E Stovold, Cochrane Airway Group Information Specialist)

#### **Ovid MEDLINE(R) ALL**

Search date: 22 February 2021

- 1 exp Bronchiectasis/
- 2 Bronchiect\$.tw.
- 3 bronchoect\$.tw.
- 4 1 or 2 or 3
- 5 exp disease progression/
- 6 exacerbation\$.tw.
- 7 5 or 6
- 8 4 and 7
- 9 Bronchiectasis/co [Complications]
- 10 8 or 9
- 11 defin\$.tw.
- 12 criteria.tw.
- 13 consensus\$.tw.
- 14 terminolog\$.tw.
- 15 (severe or severity).tw.
- 16 (mild or moderate).tw.
- 17 or/11-16
- 18 10 and 17
- 19 limit 18 to yr="2000 -Current"

#### **CENTRAL (*the Cochrane Library*, Issue 2 of 12, 2021)**

Search date: 22 February 2021

- ID Search
- #1 MeSH descriptor: [Bronchiectasis] explode all trees
- #2 Bronchiect\* or bronchoect\*
- #3 #1 or #2

#4 MeSH descriptor: [Disease Progression] explode all trees  
#5 exacerbation\*  
#6 #4 or #5  
#7 #3 and #6  
#8 MeSH descriptor: [Bronchiectasis] explode all trees and with qualifier(s): [complications - CO]  
#9 #7 or #8  
[Limited to publication year 2000 onwards]

**ClinicalTrials.gov**

Search date: 22 February 2021

| Search field | Search terms                |
|--------------|-----------------------------|
| Study type   | All studies                 |
| Condition    | Bronchiectasis exacerbation |
